# Supplementary material for: Aerosol optical properties calculated from size distributions, filter samples and absorption photometer data at Dome C, Antarctica and their relationships between seasonal cycles of sources
Source: Copernicus journal article supplement (doi:10.5194/acp-2021-562), 2021-08-06
Supplement: Supplementary file 1 [file acp-2021-562-supplement.pdf]

Virkkula et al., Aerosol optical properties calculated from size distributions, filter samples and absorption photometer data at Dome C, Antarctica and their relationships between seasonal cycles of sources

SUPPLEMENT

Figures

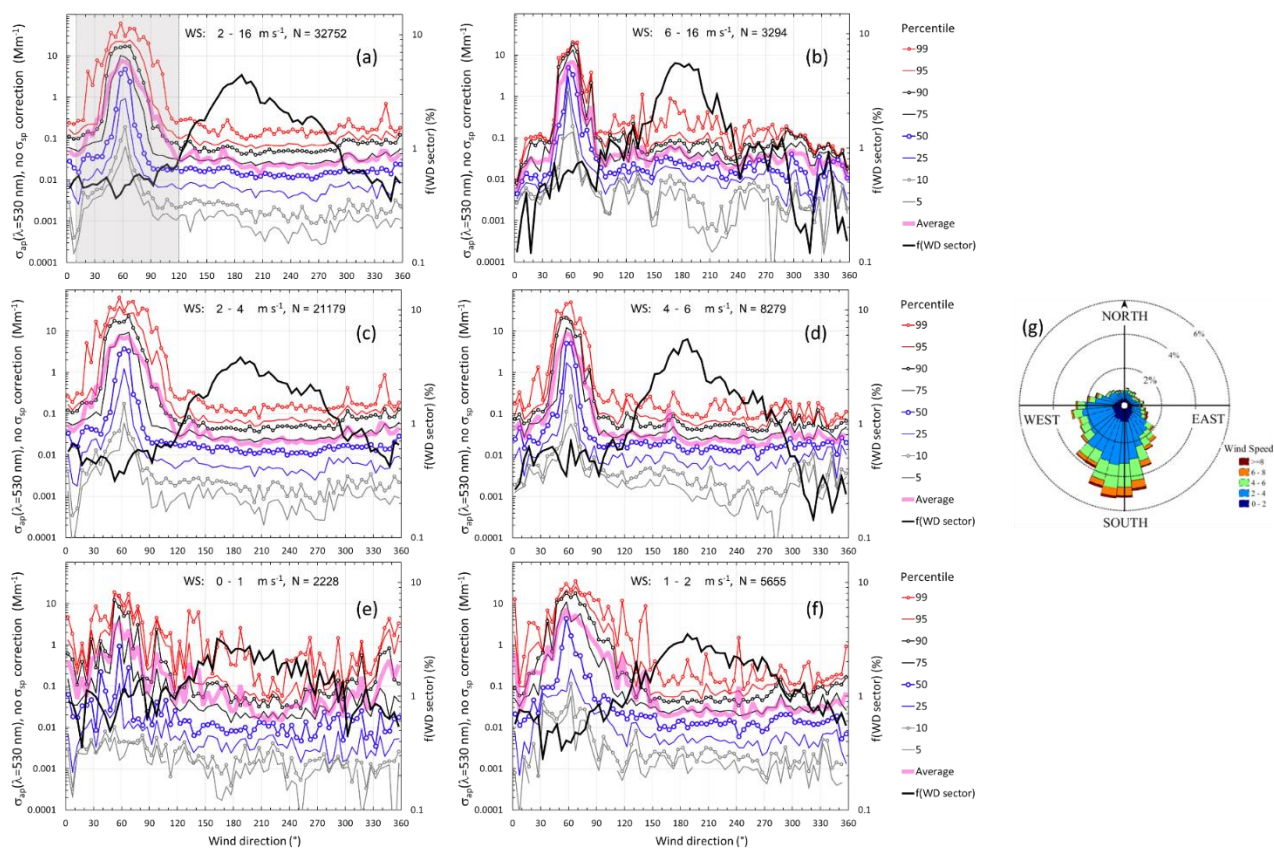

Figure S1. Absorption coefficient  $\sigma_{ap,nsc}(\lambda=530\text{nm})$  at different wind directions.

Table S1. Seasonal averages, 25<sup>th</sup>, 50<sup>th</sup> and 75<sup>th</sup> percentiles of mass concentrations calculated from the number size distributions (m(DMPS,PM<sub>0.8</sub>) and m(DMPS,PM<sub>10</sub>)) and the sum of chemical constituents analyzed from the PM<sub>1</sub> and PM<sub>10</sub> filter samples. N: for m(DMPS) the number of hourly data, for PM<sub>1</sub> and PM<sub>10</sub> the number of filter samples. See the main text for detailed explanations.

| m(size distributions) |       | m(DMPS,PM <sub>0.8</sub> ), ng m <sup>-3</sup> |             |     |     | m(DMPS,PM <sub>10</sub> ), ng m <sup>-3</sup> |     |             |     |     |
|-----------------------|-------|------------------------------------------------|-------------|-----|-----|-----------------------------------------------|-----|-------------|-----|-----|
|                       | N     | AVE                                            | Percentiles |     |     |                                               | AVE | Percentiles |     |     |
|                       |       |                                                | 25          | 50  | 75  |                                               |     | 25          | 50  | 75  |
| JAN                   | 1263  | 247                                            | 148         | 191 | 268 |                                               | 284 | 170         | 220 | 308 |
| FEB                   | 2480  | 299                                            | 174         | 272 | 386 |                                               | 349 | 203         | 318 | 451 |
| MAR                   | 1912  | 139                                            | 86          | 121 | 164 |                                               | 176 | 108         | 153 | 208 |
| APR                   | 1735  | 61                                             | 33          | 48  | 87  |                                               | 84  | 46          | 66  | 120 |
| MAY                   | 1880  | 42                                             | 17          | 26  | 37  |                                               | 75  | 31          | 46  | 67  |
| JUN                   | 1434  | 88                                             | 15          | 22  | 49  |                                               | 176 | 29          | 44  | 99  |
| JUL                   | 2471  | 85                                             | 17          | 32  | 57  |                                               | 172 | 34          | 65  | 116 |
| AUG                   | 1783  | 52                                             | 13          | 21  | 41  |                                               | 95  | 25          | 39  | 75  |
| SEP                   | 2021  | 72                                             | 33          | 49  | 71  |                                               | 115 | 52          | 79  | 113 |
| OCT                   | 2421  | 71                                             | 48          | 62  | 83  |                                               | 110 | 74          | 96  | 128 |
| NOV                   | 1275  | 151                                            | 94          | 122 | 208 |                                               | 202 | 126         | 163 | 279 |
| DEC                   | 1312  | 192                                            | 128         | 161 | 263 |                                               | 239 | 159         | 200 | 327 |
| N <sub>tot</sub>      | 21987 |                                                |             |     |     |                                               |     |             |     |     |

  

| m(filter samples) |     | PM <sub>1</sub> , ng m <sup>-3</sup> |             |     |     | PM <sub>10</sub> , ng m <sup>-3</sup> |     |             |     |     |  |
|-------------------|-----|--------------------------------------|-------------|-----|-----|---------------------------------------|-----|-------------|-----|-----|--|
|                   | N   | AVE                                  | Percentiles |     |     |                                       | AVE | Percentiles |     |     |  |
|                   |     |                                      | 25          | 50  | 75  | N                                     |     | 25          | 50  | 75  |  |
| JAN               | 45  | 141                                  | 82          | 141 | 183 | 159                                   | 167 | 111         | 143 | 208 |  |
| FEB               | 41  | 179                                  | 116         | 172 | 238 | 161                                   | 235 | 143         | 194 | 287 |  |
| MAR               | 45  | 92                                   | 66          | 88  | 114 | 183                                   | 164 | 93          | 138 | 207 |  |
| APR               | 44  | 53                                   | 30          | 46  | 71  | 177                                   | 121 | 60          | 93  | 134 |  |
| MAY               | 47  | 38                                   | 19          | 31  | 48  | 137                                   | 126 | 44          | 88  | 148 |  |
| JUN               | 34  | 39                                   | 17          | 26  | 37  | 148                                   | 139 | 40          | 75  | 171 |  |
| JUL               | 36  | 63                                   | 24          | 43  | 69  | 134                                   | 159 | 53          | 104 | 171 |  |
| AUG               | 39  | 54                                   | 23          | 44  | 69  | 135                                   | 150 | 56          | 113 | 194 |  |
| SEP               | 39  | 56                                   | 36          | 46  | 65  | 114                                   | 169 | 53          | 83  | 196 |  |
| OCT               | 29  | 51                                   | 22          | 47  | 66  | 159                                   | 148 | 82          | 125 | 196 |  |
| NOV               | 30  | 88                                   | 68          | 87  | 118 | 124                                   | 203 | 107         | 173 | 247 |  |
| DEC               | 39  | 114                                  | 82          | 112 | 142 | 133                                   | 167 | 94          | 140 | 204 |  |
| N <sub>tot</sub>  | 468 |                                      |             |     |     | 1764                                  |     |             |     |     |  |

Table S2. Seasonal averages, 25<sup>th</sup>, 50<sup>th</sup> and 75<sup>th</sup> percentiles of scattering coefficients calculated from the particle number size distributions ( $\sigma_{sp}(\text{DMPS}, \text{PM}_{0.8})$  and  $\sigma_{sp}(\text{DMPS}, \text{PM}_{10})$ ) at  $\lambda = 530$  nm and from the filter samples ( $\sigma_{sp}(\text{PM}_1)$  and  $\sigma_{sp}(\text{PM}_{10})$ ) at  $\lambda = 550$  nm. See the main text for detailed explanations. Explanation of columns as in Table S1.

| $\sigma_{sp}(\text{size distributions})$ |       | $\sigma_{sp}(\text{DMPS}, \text{PM}_{0.8}), \text{Mm}^{-1}$ |      |      |      | $\sigma_{sp}(\text{DMPS}, \text{PM}_{10}), \text{Mm}^{-1}$ |      |      |      |
|------------------------------------------|-------|-------------------------------------------------------------|------|------|------|------------------------------------------------------------|------|------|------|
|                                          |       | Percentiles                                                 |      |      |      | Percentiles                                                |      |      |      |
|                                          | N     | AVE                                                         | 25   | 50   | 75   | AVE                                                        | 25   | 50   | 75   |
| JAN                                      | 1263  | 0.43                                                        | 0.17 | 0.29 | 0.44 | 0.54                                                       | 0.21 | 0.37 | 0.56 |
| FEB                                      | 2480  | 0.54                                                        | 0.23 | 0.45 | 0.71 | 0.72                                                       | 0.31 | 0.60 | 0.93 |
| MAR                                      | 1912  | 0.23                                                        | 0.14 | 0.20 | 0.32 | 0.33                                                       | 0.20 | 0.29 | 0.46 |
| APR                                      | 1735  | 0.13                                                        | 0.05 | 0.10 | 0.15 | 0.19                                                       | 0.08 | 0.15 | 0.23 |
| MAY                                      | 1880  | 0.11                                                        | 0.03 | 0.05 | 0.09 | 0.21                                                       | 0.05 | 0.09 | 0.17 |
| JUN                                      | 1434  | 0.30                                                        | 0.03 | 0.06 | 0.14 | 0.57                                                       | 0.07 | 0.11 | 0.27 |
| JUL                                      | 2471  | 0.30                                                        | 0.05 | 0.09 | 0.19 | 0.56                                                       | 0.09 | 0.17 | 0.35 |
| AUG                                      | 1783  | 0.16                                                        | 0.04 | 0.06 | 0.12 | 0.27                                                       | 0.06 | 0.09 | 0.19 |
| SEP                                      | 2021  | 0.23                                                        | 0.09 | 0.14 | 0.22 | 0.34                                                       | 0.13 | 0.21 | 0.34 |
| OCT                                      | 2421  | 0.18                                                        | 0.10 | 0.15 | 0.21 | 0.27                                                       | 0.16 | 0.22 | 0.32 |
| NOV                                      | 1275  | 0.32                                                        | 0.14 | 0.24 | 0.52 | 0.47                                                       | 0.21 | 0.35 | 0.75 |
| DEC                                      | 1312  | 0.31                                                        | 0.19 | 0.25 | 0.42 | 0.44                                                       | 0.26 | 0.34 | 0.58 |
| $N_{\text{tot}}$                         | 21987 |                                                             |      |      |      |                                                            |      |      |      |

  

| $\sigma_{sp}(\text{filter samples})$ |     | $\sigma_{sp}(\text{PM}_1), \text{Mm}^{-1}$ |      |      |      | $\sigma_{sp}(\text{PM}_{10}), \text{Mm}^{-1}$ |      |      |      |      |
|--------------------------------------|-----|--------------------------------------------|------|------|------|-----------------------------------------------|------|------|------|------|
|                                      |     | Percentiles                                |      |      |      | Percentiles                                   |      |      |      |      |
|                                      | N   | AVE                                        | 25   | 50   | 75   | N                                             | AVE  | 25   | 50   | 75   |
| JAN                                  | 45  | 0.51                                       | 0.29 | 0.51 | 0.66 | 159                                           | 0.32 | 0.21 | 0.27 | 0.39 |
| FEB                                  | 41  | 0.64                                       | 0.42 | 0.62 | 0.86 | 161                                           | 0.45 | 0.27 | 0.37 | 0.55 |
| MAR                                  | 45  | 0.33                                       | 0.24 | 0.32 | 0.41 | 183                                           | 0.31 | 0.18 | 0.26 | 0.39 |
| APR                                  | 44  | 0.19                                       | 0.11 | 0.17 | 0.26 | 177                                           | 0.23 | 0.11 | 0.18 | 0.26 |
| MAY                                  | 47  | 0.14                                       | 0.07 | 0.11 | 0.17 | 137                                           | 0.24 | 0.08 | 0.17 | 0.28 |
| JUN                                  | 34  | 0.14                                       | 0.06 | 0.09 | 0.13 | 148                                           | 0.26 | 0.08 | 0.14 | 0.32 |
| JUL                                  | 36  | 0.23                                       | 0.09 | 0.16 | 0.25 | 134                                           | 0.30 | 0.10 | 0.20 | 0.33 |
| AUG                                  | 39  | 0.19                                       | 0.08 | 0.16 | 0.25 | 135                                           | 0.28 | 0.11 | 0.22 | 0.37 |
| SEP                                  | 39  | 0.20                                       | 0.13 | 0.16 | 0.23 | 114                                           | 0.32 | 0.10 | 0.16 | 0.37 |
| OCT                                  | 29  | 0.18                                       | 0.08 | 0.17 | 0.24 | 159                                           | 0.28 | 0.16 | 0.24 | 0.37 |
| NOV                                  | 30  | 0.32                                       | 0.24 | 0.31 | 0.43 | 124                                           | 0.39 | 0.20 | 0.33 | 0.47 |
| DEC                                  | 39  | 0.41                                       | 0.30 | 0.40 | 0.51 | 133                                           | 0.32 | 0.18 | 0.27 | 0.39 |
| $N_{\text{tot}}$                     | 468 |                                            |      |      |      | 1764                                          |      |      |      |      |

Table S3. Seasonal averages, 25<sup>th</sup>, 50<sup>th</sup> and 75<sup>th</sup> percentiles of scattering Ångström exponents of the wavelength pair  $\lambda = 467$  nm and 660 nm calculated from the lower and upper estimates of scattering coefficients, ( $\sigma_{sp}(\text{DMPS}, \text{PM}_{0.8})$  and  $\sigma_{sp}(\text{DMPS}, \text{PM}_{10})$ ), respectively. See the main text for details. Unitless. Explanation of columns as in Table S1.

| $\alpha_{sp}(\sigma_{sp}(\text{DMPS}, \text{PM}_{0.8}))$ |       |      |      |      | $\alpha_{sp}(\sigma_{sp}(\text{DMPS}, \text{PM}_{10}))$ |      |      |      |      |
|----------------------------------------------------------|-------|------|------|------|---------------------------------------------------------|------|------|------|------|
| Percentiles                                              |       |      |      |      | Percentiles                                             |      |      |      |      |
|                                                          | N     | AVE  | 25   | 50   | 75                                                      | AVE  | 25   | 50   | 75   |
| JAN                                                      | 1263  | 2.64 | 2.55 | 2.69 | 2.78                                                    | 1.92 | 1.84 | 1.97 | 2.07 |
| FEB                                                      | 2480  | 2.62 | 2.55 | 2.63 | 2.76                                                    | 1.90 | 1.83 | 1.91 | 2.03 |
| MAR                                                      | 1912  | 2.49 | 2.26 | 2.57 | 2.72                                                    | 1.72 | 1.49 | 1.79 | 1.95 |
| APR                                                      | 1735  | 2.26 | 2.12 | 2.25 | 2.38                                                    | 1.44 | 1.30 | 1.43 | 1.56 |
| MAY                                                      | 1880  | 2.24 | 2.11 | 2.24 | 2.36                                                    | 1.17 | 1.04 | 1.17 | 1.30 |
| JUN                                                      | 1434  | 2.05 | 1.96 | 2.05 | 2.15                                                    | 0.81 | 0.72 | 0.81 | 0.90 |
| JUL                                                      | 2471  | 2.09 | 1.98 | 2.05 | 2.16                                                    | 0.89 | 0.79 | 0.86 | 0.97 |
| AUG                                                      | 1783  | 2.10 | 2.03 | 2.11 | 2.20                                                    | 1.07 | 0.99 | 1.07 | 1.17 |
| SEP                                                      | 2021  | 2.08 | 1.98 | 2.11 | 2.21                                                    | 1.21 | 1.10 | 1.23 | 1.33 |
| OCT                                                      | 2421  | 2.13 | 2.08 | 2.15 | 2.21                                                    | 1.25 | 1.20 | 1.27 | 1.33 |
| NOV                                                      | 1275  | 2.27 | 2.15 | 2.31 | 2.43                                                    | 1.36 | 1.24 | 1.40 | 1.52 |
| DEC                                                      | 1312  | 2.55 | 2.50 | 2.55 | 2.62                                                    | 1.62 | 1.57 | 1.62 | 1.69 |
| $N_{\text{tot}}$                                         | 21987 |      |      |      |                                                         |      |      |      |      |

Table S4. Seasonal averages, 25<sup>th</sup>, 50<sup>th</sup> and 75<sup>th</sup> percentiles of absorption coefficient.  $\sigma_{ap}(B1999, \text{no } \sigma_{sp} \text{ correction})$ :  $\sigma_{ap}$  calculated by using Eq. (11) without scattering correction, essentially that calculated by the PSAP;  $\sigma_{ap}(\sigma_{sp}(DMPS, PM_{10}), B1999)$ :  $\sigma_{ap}$  calculated by using  $\sigma_{sp}(DMPS, PM_{10})$  for the scattering correction in Eq. (11);  $\sigma_{ap}(\sigma_{sp}(DMPS, PM_{10}), V2010)$ :  $\sigma_{ap}$  calculated by using  $\sigma_{sp}(DMPS, PM_{10})$  for the scattering correction in Eq. (12). Unit:  $Mm^{-1}$ .

| $\sigma_{ap} (\lambda=530 \text{ nm}), Mm^{-1}$ |                    |        |             |        |        |                                                  |             |        |        |                                                  |             |        |        |
|-------------------------------------------------|--------------------|--------|-------------|--------|--------|--------------------------------------------------|-------------|--------|--------|--------------------------------------------------|-------------|--------|--------|
|                                                 | $\sigma_{ap, nsc}$ |        |             |        |        | $\sigma_{ap}(\sigma_{sp}(DMPS, PM_{10}), B1999)$ |             |        |        | $\sigma_{ap}(\sigma_{sp}(DMPS, PM_{10}), V2010)$ |             |        |        |
|                                                 | N                  | AVE    | Percentiles |        |        | AVE                                              | Percentiles |        |        | AVE                                              | Percentiles |        |        |
|                                                 |                    |        | 25          | 50     | 75     |                                                  | 25          | 50     | 75     |                                                  | 25          | 50     | 75     |
| JAN                                             | 838                | 0.0212 | 0.0135      | 0.0175 | 0.0228 | 0.0119                                           | 0.0058      | 0.0104 | 0.0161 | 0.0106                                           | 0.0046      | 0.0088 | 0.0143 |
| FEB                                             | 1756               | 0.0229 | 0.0125      | 0.0151 | 0.0236 | 0.0114                                           | 0.0031      | 0.0080 | 0.0142 | 0.0099                                           | 0.0018      | 0.0062 | 0.0126 |
| MAR                                             | 1227               | 0.0110 | 0.0071      | 0.0100 | 0.0137 | 0.0052                                           | 0.0016      | 0.0037 | 0.0077 | 0.0043                                           | 0.0007      | 0.0028 | 0.0065 |
| APR                                             | 1052               | 0.0073 | 0.0051      | 0.0064 | 0.0093 | 0.0038                                           | 0.0013      | 0.0028 | 0.0064 | 0.0035                                           | 0.0008      | 0.0025 | 0.0062 |
| MAY                                             | 1262               | 0.0082 | 0.0024      | 0.0040 | 0.0073 | 0.0042                                           | 0.0009      | 0.0018 | 0.0046 | 0.0038                                           | 0.0006      | 0.0014 | 0.0042 |
| JUN                                             | 1056               | 0.0143 | 0.0027      | 0.0046 | 0.0151 | 0.0050                                           | 0.0005      | 0.0018 | 0.0067 | 0.0042                                           | 0.0002      | 0.0016 | 0.0056 |
| JUL                                             | 1886               | 0.0147 | 0.0047      | 0.0076 | 0.0139 | 0.0069                                           | 0.0013      | 0.0036 | 0.0074 | 0.0064                                           | 0.0008      | 0.0032 | 0.0065 |
| AUG                                             | 1059               | 0.0145 | 0.0062      | 0.0102 | 0.0146 | 0.0102                                           | 0.0045      | 0.0071 | 0.0098 | 0.0092                                           | 0.0040      | 0.0062 | 0.0092 |
| SEP                                             | 1681               | 0.0267 | 0.0119      | 0.0217 | 0.0289 | 0.0208                                           | 0.0086      | 0.0183 | 0.0256 | 0.0192                                           | 0.0077      | 0.0166 | 0.0237 |
| OCT                                             | 1961               | 0.0287 | 0.0219      | 0.0260 | 0.0329 | 0.0244                                           | 0.0185      | 0.0228 | 0.0285 | 0.0228                                           | 0.0172      | 0.0214 | 0.0266 |
| NOV                                             | 1091               | 0.0398 | 0.0233      | 0.0297 | 0.0578 | 0.0320                                           | 0.0170      | 0.0239 | 0.0495 | 0.0297                                           | 0.0154      | 0.0222 | 0.0470 |
| DEC                                             | 946                | 0.0266 | 0.0176      | 0.0211 | 0.0257 | 0.0203                                           | 0.0127      | 0.0160 | 0.0200 | 0.0189                                           | 0.0120      | 0.0147 | 0.0185 |
| <b>N<sub>tot</sub></b>                          | <b>15815</b>       |        |             |        |        |                                                  |             |        |        |                                                  |             |        |        |

Table S5. Seasonal averages, 25<sup>th</sup>, 50<sup>th</sup> and 75<sup>th</sup> percentiles of single-scattering albedo.

| Single-scattering albedo $\omega_b = \sigma_{sp}(DMPS, PM_{10}) / (\sigma_{sp}(DMPS, PM_{10}) + \sigma_{ap})$ , $\lambda = 530 \text{ nm}$ |                              |       |             |       |                                               |       |             |       |                                               |       |             |       |       |
|--------------------------------------------------------------------------------------------------------------------------------------------|------------------------------|-------|-------------|-------|-----------------------------------------------|-------|-------------|-------|-----------------------------------------------|-------|-------------|-------|-------|
|                                                                                                                                            | $\omega_b(\sigma_{ap, nsc})$ |       |             |       | $\omega_b(\sigma_{sp}(DMPS, PM_{10}), B1999)$ |       |             |       | $\omega_b(\sigma_{sp}(DMPS, PM_{10}), V2010)$ |       |             |       |       |
|                                                                                                                                            | N                            | AVE   | Percentiles |       |                                               | AVE   | Percentiles |       |                                               | AVE   | Percentiles |       |       |
|                                                                                                                                            |                              |       | 25          | 50    | 75                                            |       | 25          | 50    | 75                                            |       | 25          | 50    | 75    |
| JAN                                                                                                                                        | 838                          | 0.952 | 0.934       | 0.958 | 0.971                                         | 0.967 | 0.949       | 0.973 | 0.987                                         | 0.970 | 0.953       | 0.976 | 0.990 |
| FEB                                                                                                                                        | 1756                         | 0.957 | 0.931       | 0.972 | 0.979                                         | 0.972 | 0.946       | 0.987 | 0.995                                         | 0.975 | 0.951       | 0.990 | 0.998 |
| MAR                                                                                                                                        | 1227                         | 0.964 | 0.959       | 0.974 | 0.980                                         | 0.980 | 0.974       | 0.990 | 0.996                                         | 0.982 | 0.978       | 0.992 | 0.998 |
| APR                                                                                                                                        | 1052                         | 0.951 | 0.942       | 0.960 | 0.979                                         | 0.966 | 0.957       | 0.975 | 0.995                                         | 0.968 | 0.959       | 0.978 | 0.997 |
| MAY                                                                                                                                        | 1262                         | 0.955 | 0.933       | 0.965 | 0.976                                         | 0.970 | 0.947       | 0.981 | 0.992                                         | 0.973 | 0.951       | 0.984 | 0.994 |
| JUN                                                                                                                                        | 1056                         | 0.961 | 0.948       | 0.965 | 0.981                                         | 0.976 | 0.963       | 0.981 | 0.997                                         | 0.978 | 0.965       | 0.983 | 0.999 |
| JUL                                                                                                                                        | 1886                         | 0.944 | 0.923       | 0.948 | 0.978                                         | 0.959 | 0.937       | 0.963 | 0.994                                         | 0.962 | 0.943       | 0.967 | 0.996 |
| AUG                                                                                                                                        | 1059                         | 0.910 | 0.869       | 0.912 | 0.960                                         | 0.923 | 0.882       | 0.925 | 0.976                                         | 0.929 | 0.890       | 0.932 | 0.979 |
| SEP                                                                                                                                        | 1681                         | 0.891 | 0.855       | 0.898 | 0.937                                         | 0.905 | 0.868       | 0.911 | 0.951                                         | 0.911 | 0.877       | 0.919 | 0.957 |
| OCT                                                                                                                                        | 1961                         | 0.888 | 0.861       | 0.895 | 0.916                                         | 0.901 | 0.873       | 0.909 | 0.930                                         | 0.907 | 0.880       | 0.914 | 0.936 |
| NOV                                                                                                                                        | 1091                         | 0.910 | 0.893       | 0.922 | 0.939                                         | 0.924 | 0.907       | 0.936 | 0.954                                         | 0.929 | 0.914       | 0.940 | 0.958 |
| DEC                                                                                                                                        | 946                          | 0.933 | 0.924       | 0.937 | 0.948                                         | 0.947 | 0.938       | 0.952 | 0.963                                         | 0.950 | 0.941       | 0.955 | 0.966 |
| <b>N<sub>tot</sub></b>                                                                                                                     | <b>15815</b>                 |       |             |       |                                               |       |             |       |                                               |       |             |       |       |

Table S6. Seasonal averages, 25<sup>th</sup>, 50<sup>th</sup> and 75<sup>th</sup> percentiles of absorption Ångström exponent.

| $\alpha_{ap}(\sigma_{ap} > 3 \times \delta\sigma_{ap})$ |                                 |      |             |      |      |                                                  |      |             |      |      |                                                  |      |             |      |      |
|---------------------------------------------------------|---------------------------------|------|-------------|------|------|--------------------------------------------------|------|-------------|------|------|--------------------------------------------------|------|-------------|------|------|
|                                                         | $\alpha_{ap}(\sigma_{ap, nsc})$ |      |             |      |      | $\alpha_{ap}(\sigma_{sp}(DMPS, PM_{10}), B1999)$ |      |             |      |      | $\alpha_{ap}(\sigma_{sp}(DMPS, PM_{10}), V2010)$ |      |             |      |      |
|                                                         | N                               | AVE  | Percentiles |      |      | N                                                | AVE  | Percentiles |      |      | N                                                | AVE  | Percentiles |      |      |
|                                                         |                                 |      | 25          | 50   | 75   |                                                  |      | 25          | 50   | 75   |                                                  |      | 25          | 50   | 75   |
| JAN                                                     | 835                             | 0.90 | 0.78        | 0.89 | 1.07 | 695                                              | 0.45 | 0.14        | 0.40 | 0.75 | 620                                              | 1.29 | 1.06        | 1.28 | 1.51 |
| FEB                                                     | 1743                            | 0.93 | 0.50        | 0.82 | 1.22 | 983                                              | 0.84 | 0.34        | 0.83 | 1.51 | 870                                              | 1.17 | 0.76        | 1.21 | 1.49 |
| MAR                                                     | 1217                            | 0.70 | 0.35        | 0.60 | 1.04 | 645                                              | 0.34 | -0.27       | 0.37 | 0.94 | 530                                              | 1.29 | 0.71        | 1.46 | 1.67 |
| APR                                                     | 1045                            | 0.69 | 0.50        | 0.69 | 0.84 | 529                                              | 0.56 | 0.39        | 0.52 | 0.99 | 494                                              | 1.35 | 1.22        | 1.34 | 1.49 |
| MAY                                                     | 1208                            | 0.75 | 0.50        | 0.78 | 0.99 | 535                                              | 0.81 | 0.60        | 0.89 | 1.03 | 392                                              | 1.44 | 1.25        | 1.44 | 1.74 |
| JUN                                                     | 1044                            | 0.80 | 0.60        | 0.79 | 0.97 | 429                                              | 0.94 | 0.60        | 0.89 | 1.27 | 262                                              | 1.73 | 1.37        | 1.67 | 2.23 |
| JUL                                                     | 1832                            | 0.90 | 0.73        | 0.91 | 1.09 | 1180                                             | 0.88 | 0.63        | 0.89 | 1.12 | 917                                              | 1.54 | 1.44        | 1.62 | 1.77 |
| AUG                                                     | 1028                            | 0.96 | 0.82        | 0.96 | 1.10 | 913                                              | 0.93 | 0.78        | 0.95 | 1.12 | 760                                              | 1.46 | 1.20        | 1.48 | 1.75 |
| SEP                                                     | 1668                            | 0.93 | 0.86        | 0.96 | 1.04 | 1589                                             | 0.88 | 0.79        | 0.92 | 1.02 | 1472                                             | 1.41 | 1.23        | 1.41 | 1.59 |
| OCT                                                     | 1952                            | 0.89 | 0.81        | 0.90 | 0.98 | 1952                                             | 0.84 | 0.73        | 0.84 | 0.94 | 1945                                             | 1.35 | 1.18        | 1.33 | 1.49 |
| NOV                                                     | 1089                            | 0.87 | 0.79        | 0.89 | 0.95 | 1089                                             | 0.76 | 0.67        | 0.80 | 0.86 | 1062                                             | 1.38 | 1.22        | 1.34 | 1.48 |
| DEC                                                     | 946                             | 0.83 | 0.72        | 0.84 | 0.92 | 936                                              | 0.55 | 0.42        | 0.60 | 0.74 | 946                                              | 1.29 | 1.12        | 1.27 | 1.43 |
| <b>N<sub>tot</sub></b>                                  | <b>15607</b>                    |      |             |      |      | <b>11475</b>                                     |      |             |      |      | <b>10270</b>                                     |      |             |      |      |

Table S7. Seasonal averages, 25<sup>th</sup>, 50<sup>th</sup> and 75<sup>th</sup> percentiles of equivalent Black Carbon concentrations calculated from the absorption coefficients at  $\lambda=530$  nm calculated by using the B1999 algorithm without any scattering corrections and with B1999 and V2010 algorithms using  $\sigma_{sp} = \sigma_{sp}(DMPS, PM_{10})$  for the scattering corrections and assuming  $MAC = 7.78 \text{ m}^2 \text{ g}^{-1}$ .

|                  | eBC, $\text{ng m}^{-3}$   |      |             |      |                                                         |      |             |      |                                                         |      |             |      |      |
|------------------|---------------------------|------|-------------|------|---------------------------------------------------------|------|-------------|------|---------------------------------------------------------|------|-------------|------|------|
|                  | eBC( $\sigma_{ap, nsc}$ ) |      |             |      | eBC( $\sigma_{ap}(\sigma_{sp}(DMPS, PM_{10}))$ , B1999) |      |             |      | eBC( $\sigma_{ap}(\sigma_{sp}(DMPS, PM_{10}))$ , V2010) |      |             |      |      |
|                  | N                         | AVE  | Percentiles |      |                                                         | AVE  | Percentiles |      |                                                         | AVE  | Percentiles |      |      |
|                  |                           | 25   | 50          | 75   |                                                         | 25   | 50          | 75   |                                                         | 25   | 50          | 75   |      |
| JAN              | 838                       | 2.72 | 1.73        | 2.25 | 2.93                                                    | 1.53 | 0.74        | 1.34 | 2.07                                                    | 1.36 | 0.60        | 1.12 | 1.84 |
| FEB              | 1756                      | 2.95 | 1.60        | 1.94 | 3.03                                                    | 1.47 | 0.40        | 1.03 | 1.83                                                    | 1.27 | 0.23        | 0.80 | 1.62 |
| MAR              | 1227                      | 1.41 | 0.91        | 1.29 | 1.76                                                    | 0.66 | 0.20        | 0.48 | 0.99                                                    | 0.55 | 0.09        | 0.36 | 0.84 |
| APR              | 1052                      | 0.94 | 0.66        | 0.82 | 1.19                                                    | 0.49 | 0.17        | 0.37 | 0.83                                                    | 0.45 | 0.10        | 0.32 | 0.80 |
| MAY              | 1262                      | 1.06 | 0.30        | 0.52 | 0.93                                                    | 0.54 | 0.12        | 0.23 | 0.59                                                    | 0.48 | 0.08        | 0.18 | 0.54 |
| JUN              | 1056                      | 1.84 | 0.34        | 0.59 | 1.94                                                    | 0.64 | 0.06        | 0.23 | 0.86                                                    | 0.54 | 0.02        | 0.21 | 0.72 |
| JUL              | 1886                      | 1.89 | 0.61        | 0.98 | 1.79                                                    | 0.88 | 0.16        | 0.46 | 0.94                                                    | 0.82 | 0.11        | 0.41 | 0.84 |
| AUG              | 1059                      | 1.87 | 0.80        | 1.31 | 1.87                                                    | 1.31 | 0.57        | 0.92 | 1.26                                                    | 1.18 | 0.51        | 0.79 | 1.18 |
| SEP              | 1681                      | 3.43 | 1.54        | 2.79 | 3.71                                                    | 2.68 | 1.10        | 2.35 | 3.28                                                    | 2.46 | 0.98        | 2.13 | 3.04 |
| OCT              | 1961                      | 3.69 | 2.82        | 3.35 | 4.23                                                    | 3.13 | 2.38        | 2.92 | 3.67                                                    | 2.93 | 2.21        | 2.75 | 3.42 |
| NOV              | 1091                      | 5.11 | 2.99        | 3.81 | 7.43                                                    | 4.11 | 2.19        | 3.07 | 6.35                                                    | 3.82 | 1.98        | 2.86 | 6.04 |
| DEC              | 946                       | 3.42 | 2.26        | 2.71 | 3.30                                                    | 2.60 | 1.63        | 2.06 | 2.57                                                    | 2.43 | 1.54        | 1.89 | 2.38 |
| N <sub>tot</sub> | 15815                     |      |             |      |                                                         |      |             |      |                                                         |      |             |      |      |

Table S8. Seasonal averages, 25<sup>th</sup>, 50<sup>th</sup> and 75<sup>th</sup> percentiles of mass fractions of equivalent Black Carbon concentrations calculated from  $eBC/m(DMPS, PM_{0.8}) \times 100\%$ .

|                  | eBC mass fraction: eBC/m(DMPS, PM <sub>0.8</sub> ), % |      |             |      |                                                          |      |             |      |                                                          |      |             |      |      |
|------------------|-------------------------------------------------------|------|-------------|------|----------------------------------------------------------|------|-------------|------|----------------------------------------------------------|------|-------------|------|------|
|                  | feBC( $\sigma_{ap, nsc}$ )                            |      |             |      | feBC( $\sigma_{ap}(\sigma_{sp}(DMPS, PM_{10}))$ , B1999) |      |             |      | feBC( $\sigma_{ap}(\sigma_{sp}(DMPS, PM_{10}))$ , V2010) |      |             |      |      |
|                  | N                                                     | AVE  | Percentiles |      |                                                          | AVE  | Percentiles |      |                                                          | AVE  | Percentiles |      |      |
|                  |                                                       | 25   | 50          | 75   |                                                          | 25   | 50          | 75   |                                                          | 25   | 50          | 75   |      |
| JAN              | 838                                                   | 1.16 | 0.80        | 1.10 | 1.42                                                     | 0.75 | 0.36        | 0.68 | 1.03                                                     | 0.67 | 0.29        | 0.60 | 0.94 |
| FEB              | 1756                                                  | 1.19 | 0.64        | 0.90 | 1.39                                                     | 0.72 | 0.14        | 0.39 | 1.06                                                     | 0.64 | 0.08        | 0.31 | 0.95 |
| MAR              | 1227                                                  | 1.03 | 0.63        | 0.93 | 1.22                                                     | 0.53 | 0.12        | 0.35 | 0.73                                                     | 0.45 | 0.06        | 0.27 | 0.63 |
| APR              | 1052                                                  | 1.87 | 0.88        | 1.53 | 2.39                                                     | 1.25 | 0.15        | 0.92 | 1.76                                                     | 1.17 | 0.09        | 0.82 | 1.69 |
| MAY              | 1262                                                  | 2.38 | 1.25        | 1.74 | 3.54                                                     | 1.53 | 0.41        | 0.90 | 2.79                                                     | 1.38 | 0.29        | 0.76 | 2.60 |
| JUN              | 1056                                                  | 2.76 | 1.40        | 2.29 | 3.28                                                     | 1.66 | 0.21        | 1.24 | 2.30                                                     | 1.50 | 0.07        | 1.10 | 2.15 |
| JUL              | 1886                                                  | 3.66 | 1.69        | 3.75 | 5.11                                                     | 2.59 | 0.48        | 2.64 | 4.09                                                     | 2.34 | 0.32        | 2.34 | 3.67 |
| AUG              | 1059                                                  | 5.62 | 2.68        | 5.70 | 7.90                                                     | 4.66 | 1.62        | 4.73 | 7.07                                                     | 4.27 | 1.41        | 4.33 | 6.51 |
| SEP              | 1681                                                  | 6.33 | 3.87        | 5.78 | 7.74                                                     | 5.44 | 2.90        | 4.99 | 7.01                                                     | 5.06 | 2.57        | 4.49 | 6.43 |
| OCT              | 1961                                                  | 5.89 | 4.41        | 5.68 | 7.13                                                     | 5.11 | 3.65        | 4.84 | 6.37                                                     | 4.78 | 3.39        | 4.57 | 5.97 |
| NOV              | 1091                                                  | 3.68 | 2.48        | 3.08 | 4.88                                                     | 3.05 | 1.80        | 2.45 | 3.96                                                     | 2.83 | 1.61        | 2.31 | 3.76 |
| DEC              | 946                                                   | 1.98 | 1.50        | 1.85 | 2.42                                                     | 1.53 | 1.06        | 1.40 | 1.95                                                     | 1.43 | 0.98        | 1.29 | 1.76 |
| N <sub>tot</sub> | 15815                                                 |      |             |      |                                                          |      |             |      |                                                          |      |             |      |      |

Table S9. Seasonal averages, 25<sup>th</sup>, 50<sup>th</sup> and 75<sup>th</sup> percentiles of mass fractions of equivalent Black Carbon concentrations calculated from  $eBC/m(DMPS, PM_{10}) \times 100\%$ .

|                  | eBC mass fraction: eBC/m(DMPS, PM <sub>10</sub> ), % |      |             |      |                                                          |      |             |      |                                                          |      |             |      |      |
|------------------|------------------------------------------------------|------|-------------|------|----------------------------------------------------------|------|-------------|------|----------------------------------------------------------|------|-------------|------|------|
|                  | feBC( $\sigma_{ap, nsc}$ )                           |      |             |      | feBC( $\sigma_{ap}(\sigma_{sp}(DMPS, PM_{10}))$ , B1999) |      |             |      | feBC( $\sigma_{ap}(\sigma_{sp}(DMPS, PM_{10}))$ , V2010) |      |             |      |      |
|                  | N                                                    | AVE  | Percentiles |      |                                                          | AVE  | Percentiles |      |                                                          | AVE  | Percentiles |      |      |
|                  |                                                      | 25   | 50          | 75   |                                                          | 25   | 50          | 75   |                                                          | 25   | 50          | 75   |      |
| JAN              | 838                                                  | 1.01 | 0.70        | 0.95 | 1.23                                                     | 0.65 | 0.32        | 0.59 | 0.90                                                     | 0.58 | 0.25        | 0.52 | 0.82 |
| FEB              | 1756                                                 | 1.02 | 0.55        | 0.77 | 1.19                                                     | 0.61 | 0.12        | 0.33 | 0.91                                                     | 0.54 | 0.07        | 0.26 | 0.82 |
| MAR              | 1227                                                 | 0.81 | 0.50        | 0.73 | 0.97                                                     | 0.42 | 0.10        | 0.28 | 0.57                                                     | 0.36 | 0.05        | 0.22 | 0.50 |
| APR              | 1052                                                 | 1.36 | 0.64        | 1.12 | 1.74                                                     | 0.91 | 0.11        | 0.67 | 1.28                                                     | 0.85 | 0.07        | 0.60 | 1.23 |
| MAY              | 1262                                                 | 1.32 | 0.69        | 0.97 | 1.96                                                     | 0.85 | 0.23        | 0.50 | 1.55                                                     | 0.76 | 0.16        | 0.42 | 1.44 |
| JUN              | 1056                                                 | 1.37 | 0.70        | 1.14 | 1.63                                                     | 0.83 | 0.10        | 0.62 | 1.14                                                     | 0.75 | 0.04        | 0.55 | 1.07 |
| JUL              | 1886                                                 | 1.81 | 0.84        | 1.86 | 2.53                                                     | 1.28 | 0.24        | 1.31 | 2.03                                                     | 1.16 | 0.16        | 1.16 | 1.82 |
| AUG              | 1059                                                 | 3.06 | 1.46        | 3.10 | 4.30                                                     | 2.54 | 0.88        | 2.57 | 3.85                                                     | 2.33 | 0.77        | 2.35 | 3.54 |
| SEP              | 1681                                                 | 3.96 | 2.42        | 3.62 | 4.84                                                     | 3.40 | 1.81        | 3.12 | 4.39                                                     | 3.17 | 1.61        | 2.81 | 4.03 |
| OCT              | 1961                                                 | 3.80 | 2.85        | 3.67 | 4.60                                                     | 3.30 | 2.36        | 3.12 | 4.11                                                     | 3.09 | 2.19        | 2.95 | 3.85 |
| NOV              | 1091                                                 | 2.75 | 1.85        | 2.30 | 3.65                                                     | 2.28 | 1.34        | 1.83 | 2.96                                                     | 2.11 | 1.20        | 1.73 | 2.81 |
| DEC              | 946                                                  | 1.60 | 1.21        | 1.49 | 1.95                                                     | 1.23 | 0.85        | 1.12 | 1.57                                                     | 1.15 | 0.79        | 1.03 | 1.41 |
| N <sub>tot</sub> | 15815                                                |      |             |      |                                                          |      |             |      |                                                          |      |             |      |      |

Table S10. Seasonal cycles of emissions of major absorbing and scattering aerosols.  
 BC emission:s Southern Hemisphere emissions from GFED v3.1data base (<http://www.globalfiredata.org>),  
 SSA: Sea-Spray Aerosol flux from the Southern Ocean, Grythe et al. (2014)

| Month | BC emissions, g m <sup>-2</sup> |        |         | SSA<br>flux, g m <sup>-2</sup> s <sup>-1</sup> |
|-------|---------------------------------|--------|---------|------------------------------------------------|
|       | South America                   | Africa | Oceania |                                                |
| JAN   | 4.9                             | 3.1    | 8.9     | 0.924                                          |
| FEB   | 6.1                             | 2.1    | 5.2     | 1.227                                          |
| MAR   | 7.4                             | 2.8    | 2.0     | 1.253                                          |
| APR   | 7.1                             | 10.1   | 8.2     | 1.417                                          |
| MAY   | 9.6                             | 72.2   | 20.6    | 1.534                                          |
| JUN   | 19.1                            | 195.8  | 16.7    | 1.475                                          |
| JUL   | 56.4                            | 278.9  | 23.3    | 1.691                                          |
| AUG   | 347.1                           | 356.4  | 60.0    | 1.565                                          |
| SEP   | 342.9                           | 302.9  | 94.6    | 1.565                                          |
| OCT   | 57.5                            | 115.1  | 122.0   | 1.306                                          |
| NOV   | 17.0                            | 16.5   | 54.0    | 1.306                                          |
| DEC   | 6.8                             | 4.5    | 23.9    | 1.056                                          |
